# Supplementary material for: Specific TP53 subtype as biomarker for immune checkpoint inhibitors in lung adenocarcinoma
Source: PubMed Central journal article supplement — eBioMedicine. 2020 Sep 11;60:102990. doi: 10.1016/j.ebiom.2020.102990 (PMC7494676; doi:10.1016/j.ebiom.2020.102990), 2020-09-11
Supplement: mmc1.pdf [file mmc1.pdf]

## Supplementary Figures

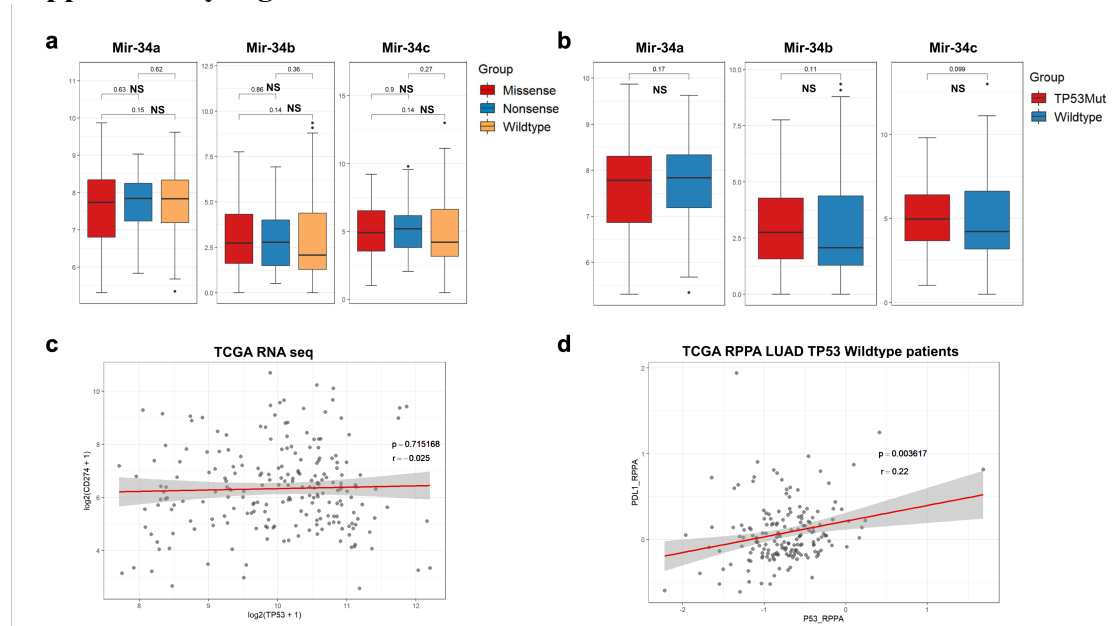

**Figure S1** the correlation of TP53 status and Mir-34 family (a, b) (Wilcox test), TP53 and PD-L1 expression indicated no statically correlation in mRNA level(c) (Spearman), a statistically positive correlation between p53 and PDL1 was also generated in TP53 wildtype groups (d) (Spearman).

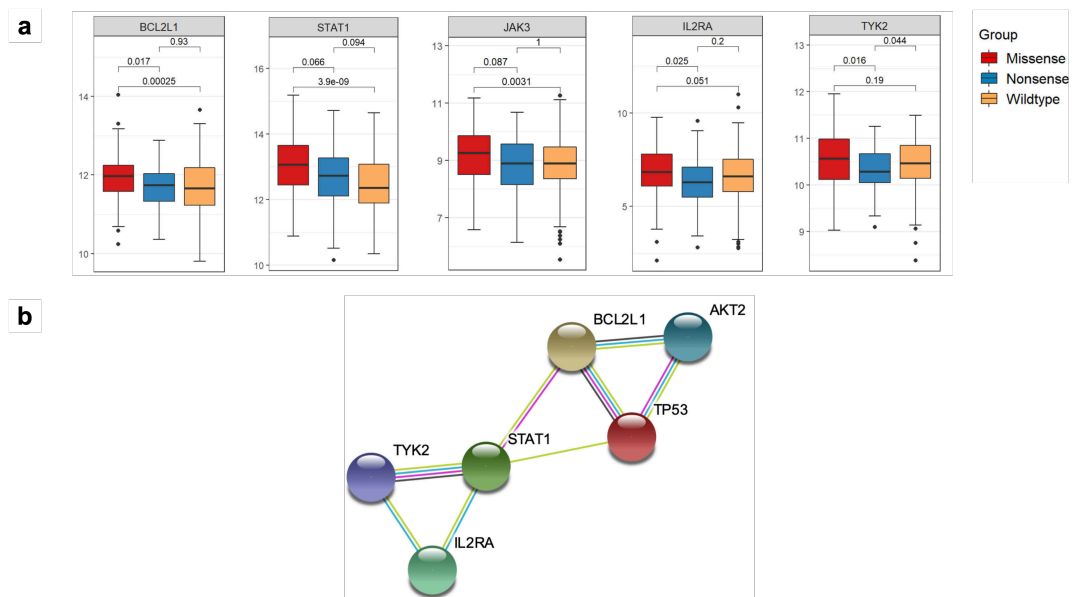

**Figure S2** several key genomic expressions enriched in TP53 missense group compared with nonsense LUAD from TCGA regarding to JAK-STAT pathway (a) (Wilcox test), and the pathway is generated from STING analysis (b).

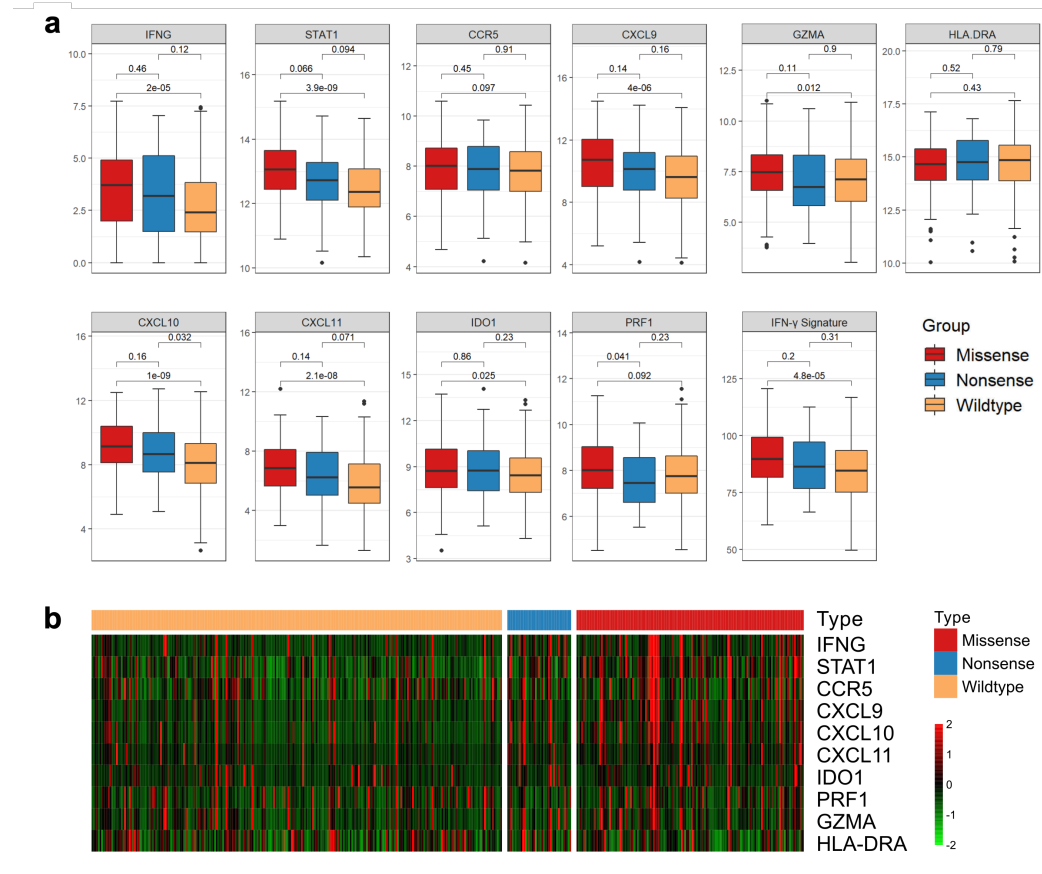

**Figure S3**

The correlation of IFN- $\gamma$  signatures with different TP53 status, (a) showed the difference in expression of key elements regarding to IFN- $\gamma$  between TP53 missense and nonsense group (Wilcox test). (b) the heatmap of IFN- $\gamma$  showed the hot-zone in TP53 missense group.

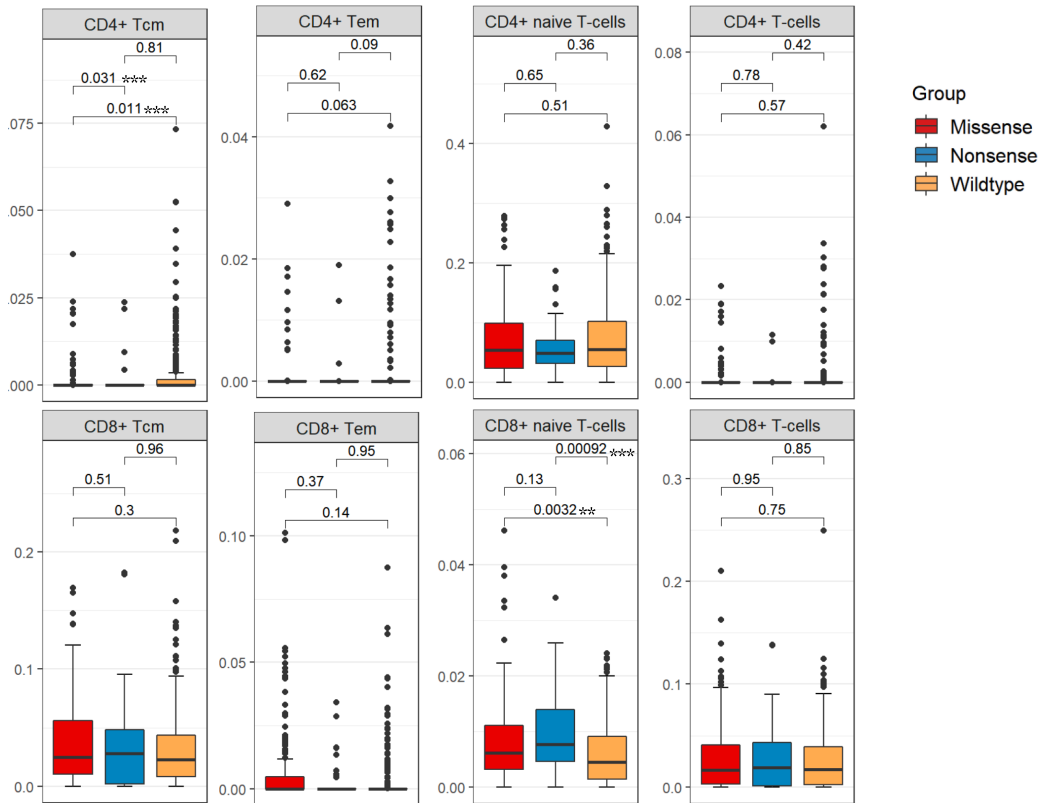

**Figure S4**

TME compositions as regard to specific T cell compositions correlation with different TP53 status (Wilcox test)

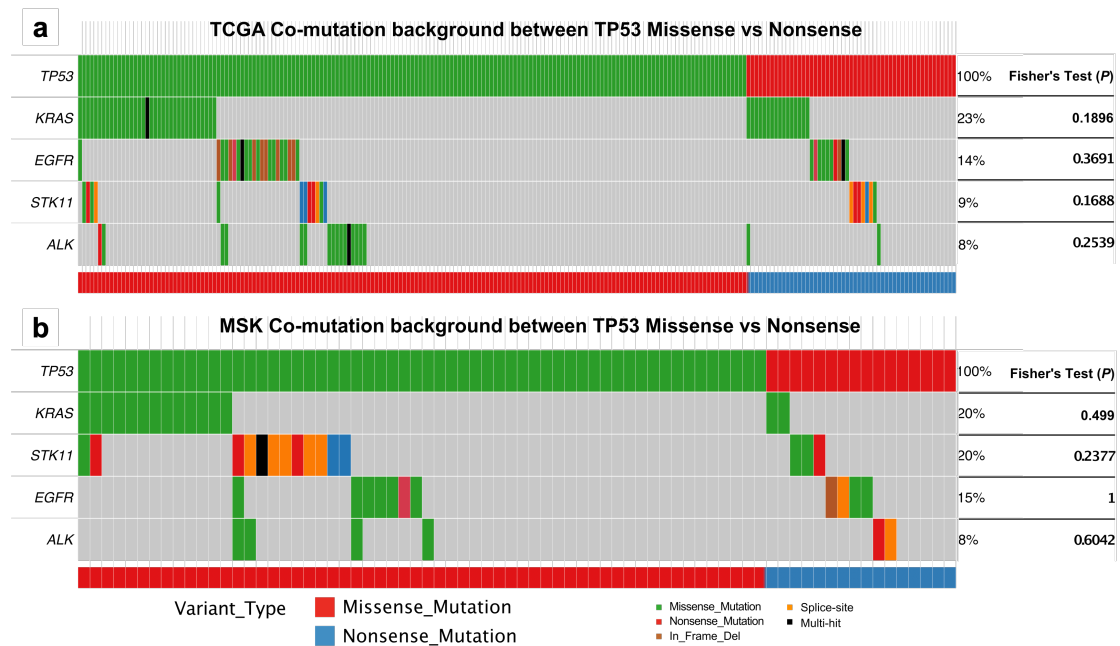

**Figure S5**

The commutation landscape regarding to KRAS/STK11/EGFR/ALK well balanced among TP53 missense and nonsense LUAD patients in cohort MSK and TCGA(a,b)

(Fisher's exact test)
